# Supplementary material
Source: MDPI journal article supplement (https://www.mdpi.com/2311-5637/8/10/560)
Supplement: s1 [file s1]

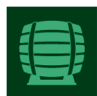

Supplementary

# Molecular dynamic model of tryptophan overproduction in *Escherichia coli*

Diego Andrés Castro-López <sup>1</sup>, Luis E. González de la Vara <sup>2</sup>, Moises Santillán <sup>3</sup> and Agustino Martínez-Antonio <sup>1,\*</sup>

<sup>1</sup> Laboratorio de Ingeniería Biológica. Departameto de Ingeniería Genética. Cinvestav Irapuato. 36824. Irapuato. Guanajuato México

<sup>2</sup> Laboratorio de Bioenergética y Biomembranas. Departameto de Bioquímica y Biotecnología. Cinvestav Irapuato. 36824. Irapuato. Guanajuato México

\* Correspondence: agustino.martinez@cinvestav.mx; Tel.: +52 462 6269660

**File S1.** Matlab code developed for the molecular dynamic model.

This code is also available at <https://gitlab.com/amalib/trp-biot-dynmod>

## Part I

This part shows the implementation of the model proposed by Santillán and Zeron [18] in MATLAB R2020b:

```
%-----  
  
%A Representation of the tryptophan operon model developed by Santillan and Zeron (2004)  
  
%Glossary of terms:  
  
%RNAP: RNA polymerase  
  
%E°M: Micromolar  
  
%RBA: Ribosome binding site  
  
%TrpE: Anthranilate synthase enzyme  
  
%tRNA-Trp:  
  
mu=0.01; %1/min: Growth rate  
  
kT=7.3*10^4; %1/min: Tryptophan production rate constant  
  
KI=4.1; %μM: TrpE inhibition constant  
  
p=240; %μM/min: Maximum metabolic tryptophan consumption, as estimated by Bliss (1982)  
  
Kp=10; %μM: Metabolic tryptophan consumption constant: It is equal to or less than one-tenth of the steady  
state tryptophan concentration, as estimated by Bliss (1982).  
  
kM= 5.1; %1/min: Rate constant of trpE expression  
  
Ot= 4*10^-3 %μM: Operon concentration
```

---

```

P=3; %μM: RNAP concentration

kP=4.5*10^-2; %μM: Dissociation constant of the reaction between RNAP and operon promoter

Rt=0.8; %μM: Concentration of repressor dimers

kR=2*10^-4; %μM: Dissociation constant of the binding reaction between repressor (TrpR) and operator

KT=40; %μM: Dissociation constant of the activation reaction between TrpR and tryptophan

KG=5; %μM: Dissociation constant of the charging reaction between uncharged tRNA-Trp and tryptophan

alfa=18.5 %Dimensionless: The reason between total tRNA-Trp (charged and uncharged) concentration and KG

gamM=0.69; %1/min: mRNA degradation rate

kE=30; %1/min, mRNA translation rate

2ame= 0; %min, TrpE degradation constant

Time=25000; %Simulation time

h=0.01; %Step size

x = 0; %Timer

yTrp = zeros(1,Time); %A matrix that stores 2ame2cellular Tryptophan concentration values

Tf= zeros(1,Time); %A matrix that stores 2ame2cellular Free Tryptophan concentration values

yTrp(1) =100*10; %Initial intracellular tryptophan concentration for a derepression experiment      41.958

yMF = zeros(1,Time); %A matrix that stores free mRNA concentration values

yMF(1) =0;% Initial free mRNA concentration for a derepression experiment

yEnz = zeros(1,Time); %A matrix that stores total trpE concentration values

yEnz(1) =0; % Initial total enzyme concentration for a derepression experiment

KeaT= zeros(1,Time);%A matrix that stores enzymatic activity values

mins=0:0.01:250; %Minutes

%-----Calculation-Loop-Runge-Kutta-4th-order-----

for i=1:Time

Tf(i)=(0.5*((KI+(2*yEnz(i))-yTrp(i))^2)+(4*KI*yTrp(i)))^0.5)-(0.5*(KI+(2*yEnz(i))-yTrp(i))); %Free trypto-
phan

F_xy = (@(t,T) (kT*yEnz(i)*(KI/(KI+Tf(i)))^2)-((p)*(Tf(i)/(Tf(i)+Kp)))-(mu*T)); %Total tryptophan

k_1 = F_xy(x,yTrp(i));

```

```

k_2 = F_xy(x+0.5*h,yTrp(i)+0.5*h*k_1);

k_3 = F_xy((x+0.5*h),(yTrp(i)+0.5*h*k_2));

k_4 = F_xy((x+h),(yTrp(i)+k_3*h));

yTrp(i+1) = yTrp(i) + ((1/6)*(k_1+2*k_2+2*k_3+k_4)*h); %Main equation, tryptophan concentration.

%-----

F_xy =

@(t,Mf) (kM*Ot*((P/kP)/(1+(P/kP)+((Rt/kR)*(Tf(i)/(Tf(i)+KT))^2)))*((1+(2*alfa*(Tf(i)/(KG+Tf(i)))))/(1+(alfa*(Tf(i)/(KG+Tf(i))))))^2))- (gamM+mu)*Mf;

k_1 = F_xy(x,yMF(i));

k_2 = F_xy(x+0.5*h,yMF(i)+0.5*h*k_1);

k_3 = F_xy((x+0.5*h),(yMF(i)+0.5*h*k_2));

k_4 = F_xy((x+h),(yMF(i)+k_3*h));

yMF(i+1) = yMF(i) + ((1/6)*(k_1+2*k_2+2*k_3+k_4)*h); % main equation, free mRNA production

%-----

if i<=100 %Equation rule before reaching enough time to apply the time delay

F_xy = @(t,Enz) (0.5*kE*yMF(1))-((3ame+mu)*Enz);

k_1 = F_xy(x,yEnz(i));

k_2 = F_xy(x+0.5*h,yEnz(i)+0.5*h*k_1);

k_3 = F_xy((x+0.5*h),(yEnz(i)+0.5*h*k_2));

k_4 = F_xy((x+h),(yEnz(i)+k_3*h));

yEnz(i+1) = yEnz(i) + ((1/6)*(k_1+2*k_2+2*k_3+k_4)*h); % main equation, trpE production

else %Equation rule after reaching enough time to apply one time delay

F_xy = @(t,Enz) (0.5*kE*yMF(i-100))-((3ame+mu)*Enz);

k_1 = F_xy(x,yEnz(i));

k_2 = F_xy(x+0.5*h,yEnz(i)+0.5*h*k_1);

k_3 = F_xy((x+0.5*h),(yEnz(i)+0.5*h*k_2));

k_4 = F_xy((x+h),(yEnz(i)+k_3*h));

yEnz(i+1) = yEnz(i) + ((1/6)*(k_1+2*k_2+2*k_3+k_4)*h); % main equation, trpE production

```

```

end

KeaT(i) = (yEnz(i) * (KI / (KI + Tf(i))) ^ 2) / 0.002633; %Normalized enzyme activity

x=x+h;

end

figure

plot(mins(1:length(mins)-1), KeaT, 'k', 'LineWidth', 2)

xlabel('Time (min)')

ylabel('Normalized enzyme activity')

ylim([0 1.2])

```

## Part II

This part shows the implementation of the model proposed by Santillán and Mackey [17] in MATLAB R2020b.

```

%-----

%*A Representation of the tryptophan operon developed by Santillan and Mackey

%Glossary of terms:

%RNAP: RNA polymerase

%μM: Micromolar

%RBA: Ribosome binding site

%TrpE: Anthranilate synthase enzyme

%List of variables for the model

Mu=0.01 %min-1: growth rate

tauP=0.1 %min: time delay corresponding to the time after which an RNAP has moved far enough to free the operon
promoter

taup= 5*10-2 %min: Time for a ribosome to free the RBS

taum= 0.1 %min: According to Santillan and Mackey "This is the time it takes for an RNAP to assemble a
functional TrpE-related ribosome-binding site,"

P=2.6 %μM: RNAP concentration

kP=3.9 %1/(μM min): Rate constant for the binding reaction between RNAP and operon promoter

Kr=1.2/460 %1/μM: Dissociation constant of the binding reaction between repressor (TrpR) and operator

```

---

```

O=3.32*10^-3 %μM: Operon concentration, considering 1.6 genome equivalents

E=0.9 %μM: Trp transport parameter, as defined by Drozdov-Tikhomirov and Skurida (1977), [19]

d=23.5 %μM/min: Maximum rate of tryptophan uptake, as defined by Drozdov-Tikhomirov and Skurida

f=380 %μM: Trp transport parameter, as defined by Drozdov-Tikhomirov and Skurida

b=0.85 %Dimensionless: this value satisfies experimental observations for attenuation

c=4*10^-2 %μM: this value satisfies experimental observations for attenuation

kp=6.9 %1/(E°M min): Rate constant for the binding reaction between a ribosome and an RBS.

p= 2.9 %μM: Ribosome concentration

kdD= 0.6 %1/min: mRNA degradation rate

gam= 0 %1/min: TrpE degradation rate

taue=0.66 %min: This is the time it takes for a ribosome to synthesize a fully functional TrpE

Ki=720/176 %1/μM: Dissociation constant of the inhibition reactions between tryptophan and TrpE

nH=1.2 %Dimensionless: Hill coefficient

Kt=(2.1*10^4)/348 %1/μM: Dissociation constant of the activation reaction between TrpR and tryptophan

R=0.8 %μM: Concentration of repressor dimers.

Kg= 0.2 %μM: Metabolic tryptophan consumption constant: It is equal to or less than one-tenth of the steady
state tryptophan concentration, as Bliss (1982) estimates.

g=25 %μM/min: Maximum metabolic tryptophan consumption, as estimated by Bliss (1982), [36]

K=126.4 %1/min: Tryptophan production rate constant

Time=25000 %Simulation time

h=0.01; %Step size

x=0; %Timer

yTrp = zeros(1,Time); %A matrix that stores intracellular Tryptophan concentration values

yTrp(1) = 16.47; %Initial intracellular tryptophan concentration for a derepression experiment

yOF = zeros(1,Time); %A matrix that stores free operon concentration values

yOF(1) = 4.7611*10^-5;% Initial free operon concentration for a derepression experiment

yMF = zeros(1,Time);%A matrix that stores free mRNA concentration values

yMF(1) = 1.1656*10^-4;% Initial free mRNA concentration for a derepression experiment

```

```

yEnz = zeros(1,Time);%A matrix that stores total trpE concentration values

yEnz(1) =0.1176; % Initial total enzyme concentration for a derepression experiment

KEaT= zeros(1,Time);%A matrix that stores enzymatic activity values

Texter= zeros(1,Time);%A matrix that stores extracellular Tryptophan concentration values

Texter(1)=0;%Initial extracellular tryptophan concentration for a derepression experiment

mins=0:0.01:250; %Minutes

%-----Calculation-Loop-Runge-Kutta-4th-order-----

for i=1:Time

F_xy      =      (@(t,T) (K*yEnz(i) * ((Ki^nH) / ((Ki^nH)+T^nH)) - ((g) * (T / (T+Kg))) + ((d) * ((Texter(i)) / (E+(Texter(i)*(1+(T/f)))))) - (mu*T))); %Total tryptophan

    k_1 = F_xy(x,yTrp(i));

    k_2 = F_xy(x+0.5*h,yTrp(i)+0.5*h*k_1);

    k_3 = F_xy((x+0.5*h), (yTrp(i)+0.5*h*k_2));

    k_4 = F_xy((x+h), (yTrp(i)+k_3*h));

    yTrp(i+1) = yTrp(i) + ((1/6)*(k_1+2*k_2+2*k_3+k_4)*h); %Main equation, tryptophan concentration.

%-----

Ra= (R)*(yTrp(i)/(yTrp(i)+Kt)); %Active repressor concentration

if i<=10 %Equation rule before reaching enough time to apply the time delay

    F_xy = (@(t, Of) ((Kr/(Kr+Ra)) * ((mu*O) - (kP*P*(Of - ((yOF(1))*exp(-mu*tauP)))))) - (mu*Of));

    k_1 = F_xy(x,yOF(i));

    k_2 = F_xy(x+0.5*h,yOF(i)+0.5*h*k_1);

    k_3 = F_xy((x+0.5*h), (yOF(i)+0.5*h*k_2));

    k_4 = F_xy((x+h), (yOF(i)+k_3*h));

    yOF(i+1) = yOF(i) + ((1/6)*(k_1+2*k_2+2*k_3+k_4)*h); %Main equation, Free operator concentration.

else %Equation rule after reaching enough time to apply the time delay

F_xy = (@(t, Of) ((Kr/(Kr+Ra)) * ((mu*O) - (kP*P*(Of - ((yOF(i-10))*exp(-mu*tauP)))))) - (mu*Of));

    k_1 = F_xy(x,yOF(i));

    k_2 = F_xy(x+0.5*h,yOF(i)+0.5*h*k_1);

```

```

k_3 = F_xy((x+0.5*h), (yOF(i)+0.5*h*k_2));

k_4 = F_xy((x+h), (yOF(i)+k_3*h));

yOF(i+1) = yOF(i) + ((1/6)*(k_1+2*k_2+2*k_3+k_4)*h); %Main equation, Free operator concentration.

end

%-----

A=b*(1-(exp(-yTrp(i)/c))); %Attenuator strength

if i<=5 %Equation rule before reaching enough time to apply the time delay

F_xy = (@(t,Mf)((kp*P*(yOF(1))*exp(-mu*taum))*(1-A))-((kp*p*(Mf-(yMF(1)*exp(-mu*taup)))))-(kdD+mu)*Mf)); %

change the function as you desire

k_1 = F_xy(x,yMF(i));

k_2 = F_xy(x+0.5*h,yMF(i)+0.5*h*k_1);

k_3 = F_xy((x+0.5*h), (yMF(i)+0.5*h*k_2));

k_4 = F_xy((x+h), (yMF(i)+k_3*h));

yMF(i+1) = yMF(i) + ((1/6)*(k_1+2*k_2+2*k_3+k_4)*h); % main equation

elseif i<=10 %Equation rule after reaching enough time to apply one time delay

F_xy = (@(t,Mf)((kp*P*(yOF(1))*exp(-mu*taum))*(1-A))-((kp*p*(Mf-(yMF(i-5)*exp(-mu*taup)))))-(kdD+mu)*Mf)); % change the function as you desire

k_1 = F_xy(x,yMF(i));

k_2 = F_xy(x+0.5*h,yMF(i)+0.5*h*k_1);

k_3 = F_xy((x+0.5*h), (yMF(i)+0.5*h*k_2));

k_4 = F_xy((x+h), (yMF(i)+k_3*h));

yMF(i+1) = yMF(i) + ((1/6)*(k_1+2*k_2+2*k_3+k_4)*h); % main equation

else %Equation rule after reaching enough time to apply two-time delays

F_xy = (@(t,Mf)((kp*P*(yOF(i-10))*exp(-mu*taum))*(1-A))-((kp*p*(Mf-(yMF(i-5)*exp(-mu*taup)))))-(kdD+mu)*Mf)); % change the function as you desire

k_1 = F_xy(x,yMF(i));

k_2 = F_xy(x+0.5*h,yMF(i)+0.5*h*k_1);

k_3 = F_xy((x+0.5*h), (yMF(i)+0.5*h*k_2));

```

```

k_4 = F_xy((x+h), (yMF(i)+k_3*h));

yMF(i+1) = yMF(i) + ((1/6)*(k_1+2*k_2+2*k_3+k_4)*h); % main equation

end

%-----

if i<=66 %Equation rule before reaching enough time to apply the time delay

F_xy = (@(t,Enz) (0.5*kp*p*yMF(1)*exp(-mu*taue)) - ((gam+mu)*Enz));

k_1 = F_xy(x,yEnz(i));

k_2 = F_xy(x+0.5*h,yEnz(i)+0.5*h*k_1);

k_3 = F_xy((x+0.5*h), (yEnz(i)+0.5*h*k_2));

k_4 = F_xy((x+h), (yEnz(i)+k_3*h));

yEnz(i+1) = yEnz(i) + ((1/6)*(k_1+2*k_2+2*k_3+k_4)*h); % main equation

else %Equation rule after reaching enough time to apply the time delay

F_xy = (@(t,Enz) (0.5*kp*p*yMF(i-66)*exp(-mu*taue)) - ((gam+mu)*Enz));

k_1 = F_xy(x,yEnz(i));

k_2 = F_xy(x+0.5*h,yEnz(i)+0.5*h*k_1);

k_3 = F_xy((x+0.5*h), (yEnz(i)+0.5*h*k_2));

k_4 = F_xy((x+h), (yEnz(i)+k_3*h));

yEnz(i+1) = yEnz(i) + ((1/6)*(k_1+2*k_2+2*k_3+k_4)*h); % main equation

end

KEaT(i)=K*yEnz(i)*((Ki^nH)/((Ki^nH)+((yTrp(i))^nH)))/24.159; %Normalized enzyme activity

x=x+h;

end

figure

plot(mins(1:length(mins)-1),KEaT, 'k','LineWidth',2)

title('ANTA synthase activity')

xlabel('Time (min)')

ylabel('Enzyme activity (x normal value)')

ylim([0 1.19])

```

### Part III

This part shows the implementation of the model proposed by Santillán and Zeron (2004) [18] in MATLAB R2020b, modified to include the effects of the enzymes TnaA and TnaB, as well as the transport system proposed by Drozdov-Tikhomirov et al. (1977) [19]. The attenuator modeling was exchanged for the modeling proposed by Santillán and Mackey (2001) [17].

```
%-----

%*A modified representation of the tryptophan operon model developed by Santillan and Zeron (2004)

%accounting for the effect of TnaA and TnaB

%Glossary of terms:

%RNAP: RNA polymerase

%μM: Micromolar

%RBA: Ribosome binding site

%TrpE: Anthranilate synthase enzyme

%tRNA-Trp:

mu=0.01; %1/min: Growth rate

kT=7.3*10^4; %1/min: Tryptophan production rate constant

KI=4.1; %℄M: TrpE inhibition constant

p=240; %℄M/min: Maximum metabolic tryptophan consumption, as estimated by Bliss (1982)

Kp=10; %℄M: Metabolic tryptophan consumption constant: It is equal to or less than one-tenth of the steady
state tryptophan concentration, as estimated by Bliss (1982).

kM= 5.1; %1/min: Rate constant of trpE expression

Ot= 4*10^-3 %℄M: Operon concentration

P=3; %℄M: RNAP concentration

kP=4.5*10^-2; %℄M: Dissociation constant of the reaction between RNAP and operon promoter

Rt=0.8; %℄M: Concentration of repressor dimers

kR=2*10^-4; %℄M: Dissociation constant of the binding reaction between repressor (TrpR) and operator

KT=40; %℄M: Dissociation constant of the activation reaction between TrpR and tryptophan

gamM=0.69; %1/min: mRNA degradation rate

b=0.85 % attenuation constant, as defined by Santillán y Mackey (2001)
```

---

```

c=4*10^-2 % attenuation constant, as defined by Santillán y Mackey (2001)

kE=30; %1/min, mRNA translation rate

gamE= 0; %min, TrpE degradation constant

ka=65 %1/min: Expression rate of tnaAB operon (it appears as kA in text)

kb=ka %1/min: Expression rate of tnaAB operon (it appears as kB in text)

EE=8.7066 %1/min: Tryptophanase rate of indol production (in text appears as ktnaA)

beta=1750 %1/min: TnaB rate of tryptophan uptake (in text appears as ktnaB)

KGG=11 %℄M: Half saturation constant of tnaAB repression by glucose.

KW=60 %℄M: Half saturation constant of tnaAB induction by tryptophan

ng=4; %Dimensionless: Hill coefficient of tnaAB repression by glucose.

nw=4; %Dimensionless: Hill coefficient of tnaAB induction by tryptophan

K1=14;%Dimensionless: empirically determined by Orozco-Gomez (2019)

K2=9; %Dimensionless: empirically determined by Orozco-Gomez (2019)

lambda=7;%Dimensionless: empirically determined by Orozco-Gomez (2019)

Ge=0 %Extracellular Glucose concentration

kmb=70 %℄M: Michaelis constant of TnaB, as experimentally determined elsewhere.

Time=50000; %Simulation time

mins=0:0.01:Time/100; %Minutes

h=0.01; %Step size

x = 0; %Timer

yTrp = zeros(1,Time); %A matrix that stores intracellular Tryptophan concentration values

yTrp(1) =16; %℄M: Initial intracellular tryptophan concentration

yMF = zeros(1,Time); %A matrix that stores free mRNA concentration values

yMF(1) =1.1656*10^-4; %℄M: Initial free mRNA concentration

yEnz = zeros(1,Time); %A matrix that stores total trpE concentration values

yEnz(1) =0.1176; %℄M: Initial total enzyme concentration

FluxTnaB=zeros(1,Time);%A matrix that stores TnaB flux values

We = zeros(1,Time)+4; %A matrix that stores external tryptophan concentration values

```

```

A = zeros(1,Time); %A matrix that stores tryptophanase concentration values

B = zeros(1,Time); %A matrix that stores TnaB concentration values

d=23.5 %°M/min: Maximum rate of tryptophan uptake according to Drozdov-Tikhomirov and Skurida (1977)

dout=d;%°M/min: Maximum rate of tryptophan export according to Drozdov-Tikhomirov and Skurida (1977)

Kt=0.9 %°M: Michaelis constant of tryptophan transport

Kf=380 %°M: Tryptophan transport inhibition constant

%-----Calculation-Loop-Runge-Kutta-4th-order-----

for i=1:Time

    pgG= ((KGG^ng)/((KGG^ng)+(Ge^ng))); %stands for transcriptional regulation via catabolite repression of the
operon genes

    pwW= (((yTrp(i)))^nw)/((KW^nw)+(yTrp(i)^nw))); %Accounts for tryptophan-mediated regulation via premature
transcriptional termination

    x1=(lambda*Ge)+We(i);

    PGWe= 1-(((x1/K1)^3)*exp(-x1/K2)); %Denotes the fraction of active tryptophanase enzymes in terms of
external glucose and tryptophan levels.

F_xy = @(t,A) ka*Ot*pgG*pwW-(mu*A);

    k_1 = F_xy(x,A(i));

    k_2 = F_xy(x+0.5*h,A(i)+0.5*h*k_1);

    k_3 = F_xy((x+0.5*h),(A(i)+0.5*h*k_2));

    k_4 = F_xy((x+h),(A(i)+k_3*h));

    A(i+1) = A(i) + ((1/6)*(k_1+2*k_2+2*k_3+k_4)*h); %main equation, Total tryptophanase concentration

F_xy = @(t,B) kb*Ot*pgG*pwW-(mu*B);

    k_1 = F_xy(x,B(i));

    k_2 = F_xy(x+0.5*h,B(i)+0.5*h*k_1);

    k_3 = F_xy((x+0.5*h),(B(i)+0.5*h*k_2));

    k_4 = F_xy((x+h),(B(i)+k_3*h));

    B(i+1) = B(i) + ((1/6)*(k_1+2*k_2+2*k_3+k_4)*h); %Main equation, TnaB concentration

%-----

```

```

Tf=(0.5*((KI+(2*yEnz(i))-yTrp(i))^2)+(4*KI*yTrp(i))^0.5)-(0.5*(KI+(2*yEnz(i))-yTrp(i))); %Free tryptophan

F_xy = @ (t,T) (kT*yEnz(i)*(KI/(KI+Tf))^2)-((p)*(Tf/(Tf+Kp)))-(mu*T)-(
(A(i)*PGeWe*T*EE)+(d*((We(i))/(We(i)*(1+(Tf/Kf))+Kt)))+(beta*B(i)*(We(i)/(We(i)+(kmb))))-
(dout*(Tf)/(Tf*(1+(We(i)/Kf))+Kt))); %Total tryptophan

k_1 = F_xy(x,yTrp(i));
k_2 = F_xy(x+0.5*h,yTrp(i)+0.5*h*k_1);
k_3 = F_xy((x+0.5*h),(yTrp(i)+0.5*h*k_2));
k_4 = F_xy((x+h),(yTrp(i)+k_3*h));
yTrp(i+1) = yTrp(i) + ((1/6)*(k_1+2*k_2+2*k_3+k_4)*h); %Main equation, total tryptophan concentration

%-----

AA=b*(1-(exp(-yTrp(i)/c))); %Attenuator

F_xy = @ (t,Mf) (kM*Ot*((P/kP)/(1+(P/kP)+((Rt/kR)*(Tf/(Tf+KT))^2)))*(1-AA)-
(gamM+mu)*Mf; %*(yOF(1))*exp(-mu*taum)*(1-A))-((kp*p*(Mf-(yMF(1)*exp(-mu*taup)))))-( (kdD+mu)*Mf)); %
change the function as you desire

k_1 = F_xy(x,yMF(i));
k_2 = F_xy(x+0.5*h,yMF(i)+0.5*h*k_1);
k_3 = F_xy((x+0.5*h),(yMF(i)+0.5*h*k_2));
k_4 = F_xy((x+h),(yMF(i)+k_3*h));
yMF(i+1) = yMF(i) + ((1/6)*(k_1+2*k_2+2*k_3+k_4)*h); % main equation, free mRNA concentration

%-----

if i<=100 %Equation rule before reaching enough time to apply the time delay

F_xy = @ (t,Enz) (0.5*kE*yMF(1))-((gamE+mu)*Enz));

k_1 = F_xy(x,yEnz(i));

```

```

k_2 = F_xy(x+0.5*h,yEnz(i)+0.5*h*k_1);

k_3 = F_xy((x+0.5*h),(yEnz(i)+0.5*h*k_2));

k_4 = F_xy((x+h),(yEnz(i)+k_3*h));

yEnz(i+1) = yEnz(i) + ((1/6)*(k_1+2*k_2+2*k_3+k_4)*h); % Main equation, trpE production

else %Equation rule after reaching enough time to apply one time delay

F_xy = @(t,Enz)(0.5*kE*yMF(i-100))-((gamE+mu)*Enz);

k_1 = F_xy(x,yEnz(i));

k_2 = F_xy(x+0.5*h,yEnz(i)+0.5*h*k_1);

k_3 = F_xy((x+0.5*h),(yEnz(i)+0.5*h*k_2));

k_4 = F_xy((x+h),(yEnz(i)+k_3*h));

yEnz(i+1) = yEnz(i) + ((1/6)*(k_1+2*k_2+2*k_3+k_4)*h); % Main equation, trpE production

end

FluxTnaB(i)=(beta*B(i)*(We(i)/(We(i)+(kmb))))); %TnaB flux

x=x+h;

end

figure

plot(mins(1:length(mins)-1),FluxTnaB,'k','LineWidth',2)

xlabel('Time (min)')

ylabel('\mu M ')

hold off

```

## Part IV

The following values in the code of Part III were changed.

- The following variables were declared:

```

We = zeros(1,Time);

Ge=5550; %Equivalent to 0.1% glucose

Time=90000;

```

- Just after  $y_{Trp}(i+1) = y_{Trp}(i) + ((1/6) * (k_{_1} + 2 * k_{_2} + 2 * k_{_3} + k_{_4}) * h)$ , on line 190, the following was added:

```
if yTrp(i+1)<0

yTrp(i+1)=0;

end
```

- Immediately after the start of the "for" cycle that implements the Runge-Kutta method, the following fragment was added, which introduces dynamic values for cell concentration and specific growth rate in minimal medium:

```
if i<=6000 %0 hours -> 1 hour

mu=0.0001;

dcellnum=8*10^6-7*10^6;

dtime=6000;

cellnum=(7*10^6)+((dcellnum/dtime)*(i));

elseif i>6000 & i<=12000 %2 hours

mu=0.0115;

dcellnum=16*10^6-8*10^6;

dtime=6000;

cellnum=(8*10^6)+((dcellnum/dtime)*(i-6000));

elseif i>12000 & i<=18000 %3 hours

mu=0.015;

dcellnum=40*10^6-16*10^6;

dtime=6000;

cellnum=(16*10^6)+((dcellnum/dtime)*(i-(12000)));

elseif i>18000 & i<=24000 %4 hours

mu=0.0159;

dcellnum=104*10^6-40*10^6;

dtime=6000;

cellnum=(40*10^6)+((dcellnum/dtime)*(i-(18000)));

elseif i>24000 & i<=30000 %5 hours

mu=0.01;
```

```
dcellnum=200*10^6-104*10^6;

dtime=6000;

cellnum=(104*10^6)+((dcellnum/dtime)*(i-(24000)));

elseif i>30000 & i<=36000 %6 hours

    mu=0.013;

    dcellnum=440*10^6-200*10^6;

    dtime=6000;

    cellnum=(200*10^6)+((dcellnum/dtime)*(i-(30000)));

    %-----

elseif i>36000 & i<=42000 %7 hours

mu=0.006;

    dcellnum=640*10^6-440*10^6;

    dtime=6000;

    cellnum=(440*10^6)+((dcellnum/dtime)*(i-36000));

elseif i>42000 & i<=48000 %8 hours

    mu=0.0033;

    dcellnum=784*10^6-640*10^6;

    dtime=6000;

    cellnum=(640*10^6)+((dcellnum/dtime)*(i-(42000)));

elseif i>48000 & i<=54000 %9 hours

    mu=0.0019;

    dcellnum=880*10^6-784*10^6;

    dtime=6000;

    cellnum=(784*10^6)+((dcellnum/dtime)*(i-(48000)));

elseif i>54000 & i<=60000 %10 hours

    mu=0.00074;

    dcellnum=920*10^6-880*10^6;

    dtime=6000;
```

```
cellnum=(880*10^6)+((dcellnum/dtime)*(i-(54000)));

elseif i>60000 & i<=66000 %11 hours

    mu=0.00035;

    dcellnum=940*10^6-920*10^6;

    dtime=6000;

    cellnum=(920*10^6)+((dcellnum/dtime)*(i-(60000)));

elseif i>66000 & i<=72000 %12 hours

    mu=0;

    dcellnum=940*10^6-928*10^6;

    dtime=6000;

    cellnum=(940*10^6)-((dcellnum/dtime)*(i-(66000)));

elseif i>72000 & i<=78000 %13 hours

    mu=0.00028;

    dcellnum=944*10^6-928*10^6;

    dtime=6000;

    cellnum=(928*10^6)+((dcellnum/dtime)*(i-(72000)));

elseif i>78000 & i<=84000 %14 hours

    mu=0.00028;

    dcellnum=960*10^6-944*10^6;

    dtime=6000;

    cellnum=(944*10^6)+((dcellnum/dtime)*(i-(78000)));

else %15 hours

    mu=0.00013;

    dcellnum=968*10^6-960*10^6;

    dtime=6000;

    cellnum=(960*10^6)+((dcellnum/dtime)*(i-(84000)));

end
```

- Just before "x=x+h" within the "for" loop shown in the code in appendix three, the following fragment was introduced:

```
%-----

F_xy = @(t,We) (-d*( (We) / (We*(1+(Tf/Kf))+Kt)) - (beta*B(i)*(We/(We+(kmb))))
+(dout*(Tf)/(Tf*(1+(We/Kf))+Kt)); %Transport equation

k_1 = F_xy(x,We(i));

k_2 = F_xy(x+0.5*h,We(i)+0.5*h*k_1);

k_3 = F_xy((x+0.5*h),(We(i)+0.5*h*k_2));

k_4 = F_xy((x+h),(We(i)+k_3*h));

We(i+1) = ((We(i) + ((1/6)*(k_1+2*k_2+2*k_3+k_4)*h)))*(8*10^-16)*((cellnum*50)/0.05); %Main equation, ex-
ternal tryptophan concentration

if We(i+1)<0

    We(i+1)=0

end

%-----
```

## Part V

The following values were replaced in the code of Part IV.

- The following variable was redefined:

```
Time=48000;

C= 8.5; %Chorismate concentration

Kmc=5.5; %Michaelis constant of TrpE

Ge=5550; %Equivalent to 0.1% glucose
```

- The fragment that was added in line 190 (Part III) was replaced by the following:

```
if i<=6000 %0 -> 1

mu=0.00033;

dcellnum=16*10^6-8*10^6;

dtime=6000;

cellnum=(8*10^6)+((dcellnum/dtime)*(i));

elseif i>6000 & i<=12000 %2
```

```
mu=0.001;

dcellnum=240*10^6-16*10^6;

dtime=6000;

cellnum=(16*10^6)+((dcellnum/dtime)*(i-6000));

elseif i>12000 & i<=18000 %3

mu=0.004;

dcellnum=720*10^6-240*10^6;

dtime=6000;

cellnum=(240*10^6)+((dcellnum/dtime)*(i-(12000)));

elseif i>18000 & i<=24000 %4

mu=0.013;

dcellnum=2240*10^6-720*10^6;

dtime=6000;

cellnum=(720*10^6)+((dcellnum/dtime)*(i-(18000)));

elseif i>24000 & i<=30000 %5

mu=0.02;

dcellnum=3840*10^6-2240*10^6;

dtime=6000;

cellnum=(2240*10^6)+((dcellnum/dtime)*(i-(24000)));

elseif i>30000 & i<=36000 %6

mu=0.02;

dcellnum=4240*10^6-3840*10^6;

dtime=6000;

cellnum=(3840*10^6)+((dcellnum/dtime)*(i-(30000)));

%-----

elseif i>36000 & i<=42000 %7

mu=0.02;

dcellnum=4280*10^6-4240*10^6;
```

```

    dtime=6000;

    cellnum=(4240*10^6)+((dcellnum/dtime)*(i-36000));

else %8

    mu=0.02;

    dcellnum=4320*10^6-4280*10^6;

    dtime=6000;

    cellnum=(4280*10^6)+((dcellnum/dtime)*(i-(42000)));

end

```

## Part VI

The following values were changed in the code of Parts IV and V, as appropriate.

- The following variables were declared:

Vmax=10000; %COMUN  $\text{g}^{\circ}\text{M}/\text{min}$ : Maximum rate of tryptophan export

Kmout=100  $\mu\text{M}$ : Michaelis constant of tryptophan transport

actcoef=5000  $\mu\text{M}$ : Activation constant

- The equation that quantifies the intracellular production of tryptophan was modified, resulting in the following equation:

$$F_{xy} = @ (t, T) (kT * y_{\text{Enz}}(i) * (KI / (KI + Tf))^2 - ((p) * (Tf / (Tf + Kp))) - (\mu * T) - (A(i) * P_{\text{GeWe}} * T * EE) + (d * ((We(i) / (We(i) * (1 + (Tf / Kf)) + Kt))) + (\beta * B(i) * (We(i) / (We(i) + (kmb)))) - (dout * (Tf) / (Tf * (1 + (We(i) / Kf)) + Kt)) - (Vmax * (Tf) / ((Tf) + (Kmout * (1 + (We(i) / actcoef))))));$$

```

    k_1 = F_xy(x, yTrp(i));

    k_2 = F_xy(x+0.5*h, yTrp(i)+0.5*h*k_1);

    k_3 = F_xy((x+0.5*h), (yTrp(i)+0.5*h*k_2));

    k_4 = F_xy((x+h), (yTrp(i)+k_3*h));

    yTrp(i+1) = yTrp(i) + ((1/6)*(k_1+2*k_2+2*k_3+k_4)*h); %Main equation, total tryptophan concentration

```

- The equation that quantifies the extracellular concentration of tryptophan was changed, as shown below.

```
%-----
```

```

F_xy = @(t,We) (-d*(We)/(We*(1+(Tf/Kf))+Kt)) -
(beta*B(i)*(We/(We+(kmb)))) + (dout*(Tf)/(Tf*(1+(We/Kf))+Kt)) + (Vout*(Tf/(Tf+Kmout)))); %Transport equation

k_1 = F_xy(x,We(i));
k_2 = F_xy(x+0.5*h,We(i)+0.5*h*k_1);
k_3 = F_xy((x+0.5*h),(We(i)+0.5*h*k_2));
k_4 = F_xy((x+h),(We(i)+k_3*h));
We(i+1) = ((We(i) + ((1/6)*(k_1+2*k_2+2*k_3+k_4)*h)))*(8*10^-16)*((cellnum*50)/0.05); % Main equation,
external tryptophan concentration

%-----

```

## Part VII

The following values were changed in Parts IV and V, as appropriate.

- The following variables were declared:

```

Vmax= 159030;

Kmout=0.2;

Actcoef1=168;

Actcoef11=700;

Cellnum=50;

Vol=50;

Flux=zeros(1,Time);%A matrix that stores flux out values

```

- The equation that quantifies the intracellular production of tryptophan was modified, resulting in the following equation:

```

F_xy = @(t,T) (kT*yEnz(i)*(KI/(KI+Tf))^2 - ((p)*(Tf/(Tf+Kp))) - (mu*T) -
(A(i)*PGeWe*T*EE) + (d*(We(i))/(We(i)*(1+(Tf/Kf))+Kt))) + (beta*B(i)*(We(i)/(We(i)+(kmb)))) -
(dout*(Tf)/(Tf*(1+(We(i)/Kf))+Kt)) - (Vmax*((Tf)/(Tf*(1+(actcoef1/(We(i))))+Kmout*(1+(actcoef11/(We(i)))))));

k_2 = F_xy(x+0.5*h,yTrp(i)+0.5*h*k_1);
k_3 = F_xy((x+0.5*h),(yTrp(i)+0.5*h*k_2));
k_4 = F_xy((x+h),(yTrp(i)+k_3*h));

```

```
yTrp(i+1) = yTrp(i) + ((1/6)*(k_1+2*k_2+2*k_3+k_4)*h); %Main equation, total tryptophan concentration
```

- The equation that quantifies the extracellular concentration of tryptophan was changed, as shown below.

```
%-----

F_xy                                     =                                     @(t,We) (-d*((We)/(We*(1+(Tf/Kf))+Kt)))-
(beta*B(i)*(We/(We+(kmb))))+(dout*(Tf)/(Tf*(1+(We/Kf))+Kt))+(Vout*(Tf/(Tf+Kmout))); %Transport equation

F_xy                                     =                                     @(t,We) (-d*((We)/(We*(1+(Tf/Kf))+Kt)))-
(beta*B(i)*(We/(We+(kmb))))+(dout*(Tf)/(Tf*(1+(We/Kf))+Kt))+Vmax*((Tf)/(Tf*(1+(actcoef1/(We)))+Kmout*(1+(act
coef11/(We))))))

k_1 = F_xy(x,We(i));

k_2 = F_xy(x+0.5*h,We(i)+0.5*h*k_1);

k_3 = F_xy((x+0.5*h),(We(i)+0.5*h*k_2));

k_4 = F_xy((x+h),(We(i)+k_3*h));

We(i+1) = (We(i) + ((1/6)*(k_1+2*k_2+2*k_3+k_4)*h))*(8*10^-16)*((cellnum*50)/0.05); % Main equation,
external tryptophan concentration production
```

- An equation was added to quantify the flux of tryptophan into the culture medium. It was added immediately before the term "x=x+h".

```
Flux(i)= Vmax*((Tf)/(Tf*(1+(actcoef1/(We(i))))+Kmout*(1+(actcoef11/(We(i))))))
```

## Part VIII

The following elements were added and/or replaced with respect Part VII:

- The following constants were declared:

```
OP=5*2.5*10^-3 %µM: Plasmid concentration
```

```
kMlac=0.18; %µM: Lac promoter expression rate
```

```

Ge=111000; %μM, Equivalent to 2% glucose

pp=0.127; %probability that an RNAP molecule will bind to the promoter in the absence of the CAP activator
(catabolite activating protein)

kpc=30; % Constant value, cooperativity between CAP and lac promoter

kgg=2.6; %μM, constant value

nhh=1.3 %constant value

C= 150

```

- The fragment that calculates the concentration of free mRNA was modified. It was exchanged for the following fragment:

```

pc=(kgg^nhh)/((kgg^nhh)+(Ge^nhh));

PD=(pp*(1+(pc*(kpc-1)))/(1+(pp*pc*(kpc-1))));

F_xy = @(t,Mf) (kM*Ot*((P/kP)/(1+(P/kP)+((Rt/kR)*(Tf/(Tf+KT))^2)))*(1-AA)+(kMlac*OtP*PD*0.3)-(gamM+mu)*Mf;%
change the function as you desire

k_1 = F_xy(x,yMF(i));

k_2 = F_xy(x+0.5*h,yMF(i)+0.5*h*k_1);

k_3 = F_xy((x+0.5*h),(yMF(i)+0.5*h*k_2));

k_4 = F_xy((x+h),(yMF(i)+k_3*h));

yMF(i+1) = yMF(i) + ((1/6)*(k_1+2*k_2+2*k_3+k_4)*h); % main equation, free mRNA concentration

```

- The central equation that calculates the extracellular concentration of tryptophan was slightly modified to plot the concentration in g/L instead of micromoles.

```

We(i+1) = ((We(i) + ((1/6)*(k_1+2*k_2+2*k_3+k_4)*h)))*(8*10^-16)*((cellnum*300)/0.3); % Main equation,
external tryptophan concentration

```

- The cycle created in Parts IV and V was replaced by a new cycle that describes the growth and number of GPT1001 mutant cells in complex culture (Gu et al., 2012) [40].

```

if i<=36000

```

```
mu=0.00389;

dcellnum=2.6*10^9-6.4*10^8;

dGe=116569-111000;

dtime=36000;

Ge=116569-((dGe/dtime)*i);

    cellnum=(6.4*10^8)+((dcellnum/dtime)*i);

elseif i>36000 & i<=72000

    mu=0.0013;

    dGe=111000-69384;

    Ge=111000-((dGe/dtime)*(i-36000));

        dcellnum=4.16*10^9-2.6*10^9;

        dtime=36000;

        cellnum=(2.6*10^9)+((dcellnum/dtime)*(i-36000));

elseif i>72000 & i<=108000

    mu=0.00143;

    dGe=69384-64835;

    Ge=69384-((dGe/dtime)*(i-(72000)));

        dcellnum=6.96*10^9-4.16*10^9;

        dtime=36000;

        cellnum=(4.16*10^9)+((dcellnum/dtime)*(i-(72000)));

elseif i>108000 & i<=144000

    mu=0.000726;

    dGe=64835-44407;

    Ge=64835-((dGe/dtime)*(i-(108000)));

        dcellnum=9.04*10^9-6.96*10^9;

        dtime=36000;

        cellnum=(6.96*10^9)+((dcellnum/dtime)*(i-(108000)));

elseif i>144000 & i<=180000
```

```

mu=0.00016;

dGe=44407-13877;

Ge=44407-((dGe/dtime)*(i-(144000)));

dtime=36000;

dcellnum=9.6*10^9-9.04*10^9;

cellnum=(9.04*10^9)+((dcellnum/dtime)*(i-(144000)));

elseif i>180000 & i<=216000

mu=0.000248;

dGe=13877-4440;

Ge=13877-((dGe/dtime)*(i-(180000)));

dcellnum=1.05*10^10-9.6*10^9;

dtime=36000;

cellnum=(9.6*10^9)+((dcellnum/dtime)*(i-(180000)));

else

mu=0.000248;

kM=1;

kE=5;

cellnum=1.05*10^10;

end

```

## Part IX

The following item was changed from Part VIII.

- The following variables were declared:

```

Vmax2=192276000;

Kmout2=8200;

Actcoef2=123000

Actcoef21=410000;

```

```
Vmax3=64827000;

Kmout3=12300;

actcoef3=270600;

actcoef31=82000
```

- The equation that quantifies the intracellular production of tryptophan was modified, resulting in the following equation:

```
F_xy = @(t,T) (kT*yEnz(i)*(C/(C+trpEkm)) - ((p)*(Tf/(Tf+Kp))) - (mu*T) -

(A(i)*PGeWe*T*EE) + (d*(We(i))/(We(i)*(1+(Tf/Kf))+Kt))) + (beta*B(i)*(We(i)/(We(i)+(kmb)))) -

(dout*(Tf)/(Tf*(1+(We(i)/Kf))+Kt))) -

(Vmax*((Tf)/(Tf*(1+(actcoef1/(We(i)))))+Kmout*(1+(actcoef11/(We(i)))))) -

(Vmax2*((Tf)/(Tf*(1+(actcoef2/(We(i)))))+Kmout2*(1+(actcoef21/(We(i)))))) -

(Vmax3*((Tf)/(Tf*(1+(actcoef3/(We(i)))))+Kmout3*(1+(actcoef31/(We(i))))))

(Vmax4*((Tf)/(Tf*(1+(actcoef4/(Tf)))+Kmout4*(1+(actcoef41/(Tf))))));

k_1 = F_xy(x,yTrp(i));

k_2 = F_xy(x+0.5*h,yTrp(i)+0.5*h*k_1);

k_3 = F_xy((x+0.5*h),(yTrp(i)+0.5*h*k_2));

k_4 = F_xy((x+h),(yTrp(i)+k_3*h));

yTrp(i+1) = yTrp(i) + ((1/6)*(k_1+2*k_2+2*k_3+k_4)*h); %Main equation, total tryptophan

concentration
```

## Part X

The cycle added to Part VIII was replaced by a new cycle that describes the growth and number of GPT1002 mutant cells in complex culture (Gu et al., 2012) [40].

%GPT1002

```
if i<=36000

mu=0.00348;

dGe=108239-97138;

dtime=36000;

Ge=116569-((dGe/dtime)*i);

dcellnum=2.24*10^9-6.4*10^8;
```

```
    dtime=36000;

    cellnum=((6.4*10^8)+((dcellnum/dtime)*i));

elseif i>36000 & i<=72000

    mu=0.00172;

    dGe=97138-74935;

    Ge=111000-((dGe/dtime)*(i-36000));

    dcellnum=4.16*10^9-2.24*10^9;

    dtime=36000;

    cellnum=((2.24*10^9)+((dcellnum/dtime)*(i-36000)));

elseif i>72000 & i<=108000

    mu=0.001265;

    dGe=74935-64835;

    Ge=74935-((dGe/dtime)*(i-(72000)));

    dcellnum=6.56*10^9-4.16*10^9;

    dtime=36000;

    cellnum=((4.16*10^9)+((dcellnum/dtime)*(i-(72000))));

elseif i>108000 & i<=144000

    mu=0.000816;

    dGe=64835-41630;

    Ge=64835-((dGe/dtime)*(i-(108000)));

    dcellnum=8.8*10^9-6.56*10^9;

    dtime=36000;

    cellnum=((6.56*10^9)+((dcellnum/dtime)*(i-(108000))));

elseif i>144000 & i<=180000

    mu=0.00041;

    dGe=41630-13877;

    Ge=41630-((dGe/dtime)*(i-(144000)));

    dcellnum=1.02*10^10-8.8*10^9;
```

```

dtime=36000;

cellnum=((8.8*10^9)+((dcellnum/dtime)*(i-(144000))));

elseif i>180000 & i<=216000

    mu=0.00054;

    dGe=13877-2775;

    Ge=13877-((dGe/dtime)*(i-(180000)));

    dcellnum=1.24*10^10-1.02*10^10;

    dtime=36000;

    cellnum=((1.02*10^10)+((dcellnum/dtime)*(i-(180000))));

else

    mu=0.00054;

    kM=1*2;

    kE=7;

    cellnum=1.24*10^11;

end

```

**Table S1.** Growth parameters of *E. coli* cultures growing on LB medium.

| Hours | OD <sub>600</sub> | Cells/ml               | Specific growth rate h <sup>-1</sup> | Specific growth rate min <sup>-1</sup> |
|-------|-------------------|------------------------|--------------------------------------|----------------------------------------|
| 0     | 0.01              | 8 × 10 <sup>6</sup>    | 0.010                                | 0.00017                                |
| 1     | 0.02              | 1.60 × 10 <sup>7</sup> | 0.693                                | 0.01155                                |
| 2     | 0.3               | 2.40 × 10 <sup>8</sup> | 2.708                                | 0.04513                                |
| 3     | 0.9               | 7.20 × 10 <sup>8</sup> | 1.099                                | 0.01831                                |
| 4     | 2.8               | 2.24 × 10 <sup>9</sup> | 1.135                                | 0.01892                                |
| 5     | 4.8               | 3.84 × 10 <sup>9</sup> | 0.539                                | 0.00898                                |
| 6     | 5.3               | 4.24 × 10 <sup>9</sup> | 0.099                                | 0.00165                                |
| 7     | 5.35              | 4.28 × 10 <sup>9</sup> | 0.009                                | 0.00016                                |
| 8     | 5.4               | 4.32 × 10 <sup>9</sup> | 0.009                                | 0.00016                                |

Absorbance (OD<sub>600</sub>), cell number, and growth rate were calculated from the data reported by Baev et al. [50]. Cell concentration and growth rate were calculated as described in the text.

**Table S2.** Growth parameters of *E. coli* GPT1001 growing in a complex medium with glucose.

| Minutes | GPT1001 OD <sub>600</sub> | Cells/ml               | Specific growth rate h <sup>-1</sup> | Specific growth rate min <sup>-1</sup> | Glucose g/L |
|---------|---------------------------|------------------------|--------------------------------------|----------------------------------------|-------------|
| 0       | 0.8                       | 6.4 × 10 <sup>8</sup>  | <0.01                                | <0.0001                                | 20.8        |
| 360     | 3.25                      | 2.6 × 10 <sup>9</sup>  | 0.2336                               | 0.00389                                | 17.5        |
| 720     | 5.2                       | 4.16 × 10 <sup>9</sup> | 0.0783                               | 0.00130                                | 13.5        |

|      |      |                       |        |         |     |
|------|------|-----------------------|--------|---------|-----|
| 1080 | 8.7  | $6.96 \times 10^9$    | 0.0857 | 0.00143 | 9.5 |
| 1440 | 11.3 | $9.04 \times 10^9$    | 0.0435 | 0.00072 | 6.9 |
| 1800 | 12   | $9.6 \times 10^9$     | 0.0100 | 0.00016 | 2   |
| 2160 | 13.1 | $1.05 \times 10^{10}$ | 0.0149 | 0.00024 | 0.8 |

Absorbance ( $OD_{600}$ ), cell numbers, glucose concentration ( $g/L$ ), and specific growth rate of the GPT1001 mutant were calculated from the data provided by Gu et al. [40]. The authors report the absorbance in cultures of *E. coli* GPT1001 growing in a complex medium with glucose. Cell concentration and growth rate were calculated as described in the text.

**Table S3.** Growth parameters of *E. coli* GPT1002 growing in a complex medium with glucose.

| Minutes | GPT1002 $OD_{600}$ | Cells/ml              | Specific growth rate $h^{-1}$ | Specific growth rate $min^{-1}$ | Glucose $g/L$ |
|---------|--------------------|-----------------------|-------------------------------|---------------------------------|---------------|
| 0       | 0.8                | $6.40 \times 10^8$    | 0                             | 0                               | 19.5          |
| 360     | 2.8                | $2.24 \times 10^9$    | 0.20879                       | 0.00347                         | 17.5          |
| 720     | 5.2                | $4.16 \times 10^9$    | 0.10317                       | 0.00171                         | 12.1          |
| 1080    | 8.2                | $6.56 \times 10^9$    | 0.07591                       | 0.00126                         | 9.5           |
| 1440    | 11                 | $8.80 \times 10^9$    | 0.04896                       | 0.00081                         | 7             |
| 1800    | 12.7               | $1.02 \times 10^{10}$ | 0.02460                       | 0.00041                         | 2.4           |
| 2160    | 15.5               | $1.24 \times 10^{10}$ | 0.03255                       | 0.00054                         | 0.5           |

Absorbance ( $OD_{600}$ ), cell numbers, glucose concentration ( $g/L$ ), and specific growth rate of the GPT1002 mutant were calculated from the data provided by Gu et al. [40]. The authors report the absorbance in cultures of *E. coli* GPT1002 growing in a complex medium with glucose. Cell concentration and growth rate were calculated as described in the text.
